# Supplementary material for: Seed Size, Planting Depth, and a Perennial Groundcover System Effect on Corn Emergence and Grain Yield
Source: MDPI journal article supplement (doi:10.3390/agronomy12020437), 2022-02-10
Supplement: s1 [file s1]

**Table S1.** Combined treatments mean for a KBG perennial ground cover system separated by year and hybrid. Normalized Emergence was calculated by aligning data to start on the same first emergence date for both planting depths.

| Year          | Hy7016CNVid          | Size             | Planting depths | Emergence                    | Normalized Emergence         | Yield<br>(Mg/ha) |
|---------------|----------------------|------------------|-----------------|------------------------------|------------------------------|------------------|
|               |                      |                  | (cm)            | Days after planting<br>(DAP) | Days after planting<br>(DAP) |                  |
| 2019          | 7016CNV <sup>1</sup> | Bag <sup>2</sup> | 3.18            | 18.81 a                      | 18.81 a                      | 10.51            |
|               |                      |                  | 6.35            | 21.91 b                      | 17.91 b                      | 9.87             |
|               |                      | Re-sized         | 3.18            | 19.08 a                      | 19.08 a                      | 11.12            |
|               |                      |                  | 6.35            | 22.29 b                      | 18.29 ab                     | 10.33            |
|               |                      | LSD (0.05)       |                 | 0.8                          | 0.8                          | 2.66             |
|               |                      |                  |                 |                              |                              |                  |
| 2019          | 1197                 | Bag              | 3.18            | 19.72 b                      | 19.72                        | 10.61            |
|               |                      |                  | 6.35            | 22.96 a                      | 18.96                        | 12.81            |
|               |                      | Re-sized         | 3.18            | 19.41 b                      | 19.41                        | 12.63            |
|               |                      |                  | 6.35            | 23.01 a                      | 19.01                        | 11.82            |
|               |                      | LSD (0.05)       |                 | 0.87                         | 0.87                         | 3.14             |
|               |                      |                  |                 |                              |                              |                  |
| 2020          | 7016CNV              | Bag              | 3.18            | 16.35                        | 16.35 ab                     | 3.82             |
|               |                      |                  | 6.35            | 16.97                        | 15.97 ab                     | 2.81             |
|               |                      | Re-sized         | 3.18            | 17.42                        | 17.42 a                      | 3.56             |
|               |                      |                  | 6.35            | 16.19                        | 15.19 b                      | 4.68             |
|               |                      | LSD (0.05)       |                 | 1.81                         | 1.81                         | 1.29             |
|               |                      |                  |                 |                              |                              |                  |
| 2020          | 1197                 | Bag              | 3.18            | 17.19 ab                     | 17.19                        | 4.80             |
|               |                      |                  | 6.35            | 18.08 a                      | 17.08                        | 6.30             |
|               |                      | Re-sized         | 3.18            | 16.52 b                      | 16.52                        | 6.45             |
|               |                      |                  | 6.35            | 16.86 ab                     | 15.86                        | 6.54             |
|               |                      | LSD (0.05)       |                 | 1.5                          | 1.5                          | 3.29             |
|               |                      |                  |                 |                              |                              |                  |
| 2019 and 2020 | Both                 | Combined         | 3.18            | 18.08 a                      | 18.08 a                      | 8.08             |
|               |                      | Combined         | 6.35            | 19.78 b                      | 17.28 b                      | 8.29             |
|               |                      | LSD (0.05)       |                 | 1.2                          | 0.78                         | 1.88             |

<sup>1</sup>Same seed lot used in 2019 and 2020

<sup>2</sup>Seed that was received in the bag

Different letters indicate a significant difference among treatments

**Table S2.** Combined treatments means for a bare soil system separated by year and hybrid. Normalized Emergence was calculated by aligning data to start on the same first emergence date for both planting depths.

| Year | Hybrid               | Size             | Planting depths | Emergence                    | Normalized Emergence         | Yield<br>(Mg/ha) |
|------|----------------------|------------------|-----------------|------------------------------|------------------------------|------------------|
|      |                      |                  | (cm)            | Days after planting<br>(DAP) | Days after planting<br>(DAP) |                  |
| 2019 | 7016CNV <sup>1</sup> | Bag <sup>2</sup> | 3.18            | 19.31 b                      | 19.31 a                      | 14.96 a          |
|      |                      |                  | 6.35            | 22.19 a                      | 18.19 b                      | 14.84 a          |
|      |                      | Re-sized         | 3.18            | 19.33 b                      | 19.33 a                      | 13.41 b          |
|      |                      |                  | 6.35            | 22.52 a                      | 18.52 b                      | 14.08 ab         |
|      |                      | LSD (0.05)       |                 | 0.44                         | 0.44                         | 1.25             |
|      |                      |                  |                 |                              |                              |                  |
| 2019 | 1197                 | Bag              | 3.18            | 20.31 b                      | 20.31 a                      | 17.19            |
|      |                      |                  | 6.35            | 23.22 a                      | 19.22 b                      | 17.04            |
|      |                      | Re-sized         | 3.18            | 20.38 b                      | 20.38 a                      | 17.47            |
|      |                      |                  | 6.35            | 23.58 a                      | 19.58 b                      | 16.87            |
|      |                      | LSD (0.05)       |                 | 0.71                         | 0.71                         | 2.81             |
|      |                      |                  |                 |                              |                              |                  |
| 2020 | 7016CNV              | Bag              | 3.18            | 13.35 b                      | 13.35                        | 9.46             |

|               |            |          |      |          |       |       |
|---------------|------------|----------|------|----------|-------|-------|
|               |            |          | 6.35 | 13.84 ab | 12.84 | 10.46 |
|               |            | Re-sized | 3.18 | 13.15 b  | 13.15 | 10.98 |
|               |            |          | 6.35 | 14.36 a  | 13.36 | 11.21 |
|               | LSD (0.05) |          |      | 0.79     | 0.79  | 3.17  |
| 2020          | 1197       | Bag      | 3.18 | 13.08 ab | 13.08 | 12.24 |
|               |            |          | 6.35 | 13.81 a  | 12.81 | 12.00 |
|               |            | Re-sized | 3.18 | 12.70 b  | 12.70 | 12.58 |
|               |            |          | 6.35 | 13.88 a  | 12.88 | 12.12 |
|               | LSD (0.05) |          |      | 0.8      | 0.8   | 1.58  |
| 2019 and 2020 | Both       | Combined | 3.18 | 16.45    | 16.45 | 13.54 |
|               | Both       | Combined | 6.35 | 18.42    | 15.92 | 13.58 |
|               | LSD (0.05) |          |      | 2.08     | 1.68  | 1.49  |

<sup>1</sup>Same seed lot used in  
2019 and 2020

<sup>2</sup>Seed that was  
received in the bag

Different letters indicate a significant  
difference among treatments

**Table S3.** Means for combined planting depths in a KBG perennial ground cover system separated by year and hybrid. Normalized Emergence was calculated by aligning data to start on the same first emergence date for both planting depths.

| Year          | Hybrid     | Size     | Emergence<br>Days after planting<br>(DAP) | Normalized Emergence<br>Days after planting<br>(DAP) | Yield<br>(Mg/ha) |
|---------------|------------|----------|-------------------------------------------|------------------------------------------------------|------------------|
| 2019          | 7016CNV    | Bag      | 20.36                                     | 18.36 b                                              | 10.37            |
|               | 1197       |          | 21.34                                     | 19.34 a                                              | 11.71            |
|               | 7016CNV    | Re-sized | 20.69                                     | 18.69 ab                                             | 10.73            |
|               | 1197       |          | 21.21                                     | 19.21 a                                              | 12.23            |
|               | LSD (0.05) |          | 1.98                                      | 0.66                                                 | 1.86             |
| 2020          | 7016CNV    | Bag      | 16.66                                     | 16.16                                                | 3.70 c           |
|               | 1197       |          | 17.64                                     | 17.14                                                | 5.55 ab          |
|               | 7016CNV    | Re-sized | 16.72                                     | 16.15                                                | 4.20 bc          |
|               | 1197       |          | 16.69                                     | 16.19                                                | 6.49 a           |
|               | LSD (0.05) |          | 1.06                                      | 1.17                                                 | 1.66             |
| 2019 and 2020 | Both       | Bag      | 19.00                                     | 17.75                                                | 7.83             |
|               | Both       | Re-sized | 18.89                                     | 17.60                                                | 8.55             |
|               | LSD (0.05) |          | 1.29                                      | 0.81                                                 | 1.86             |

Different letters indicate a significant difference among treatments

**Table S4.** Means for combined planting depths in a bare soil system separated by year and hybrid. Normalized Emergence was calculated by aligning data to start on the same first emergence date for both planting depths.

| Year | Hybrid     | Size     | Emergence<br>Days after planting<br>(DAP) | Normalized Emergence<br>Days after planting<br>(DAP) | Yield<br>(Mg/ha) |
|------|------------|----------|-------------------------------------------|------------------------------------------------------|------------------|
| 2019 | 7016CNV    | Bag      | 20.75                                     | 18.75 b                                              | 14.90 b          |
|      | 1197       |          | 21.76                                     | 19.76 a                                              | 17.12 a          |
|      | 7016CNV    | Re-sized | 20.92                                     | 18.92 b                                              | 13.75 b          |
|      | 1197       |          | 21.98                                     | 19.98 a                                              | 17.17 a          |
|      | LSD (0.05) |          | 1.82                                      | 0.68                                                 | 1.35             |
| 2020 | 7016CNV    | Bag      | 13.59                                     | 13.09                                                | 9.96 b           |

|                                                                      |            |          |       |       |          |
|----------------------------------------------------------------------|------------|----------|-------|-------|----------|
|                                                                      | 1197       |          | 13.45 | 12.95 | 12.12 a  |
|                                                                      | 7016CNV    | Re-sized | 13.76 | 13.26 | 11.09 ab |
|                                                                      | 1197       |          | 13.29 | 12.79 | 12.35 a  |
|                                                                      | LSD (0.05) |          | 0.74  | 0.52  | 1.67     |
| 2019 and 2020                                                        | Both       | Bag      | 17.39 | 16.14 | 13.53    |
|                                                                      | Both       | Re-sized | 17.49 | 16.24 | 13.59    |
|                                                                      | LSD (0.05) |          | 2.14  | 1.69  | 1.49     |
| Different letters indicate a significant difference among treatments |            |          |       |       |          |
