# Supplementary material for: Seed Size, Planting Depth, and a Perennial Groundcover System Effect on Corn Emergence and Grain Yield
Source: MDPI journal article supplement (doi:10.3390/agronomy12020437), 2022-02-10
Supplement: s1 [file s1]

Archive with 1 entries (1 files):
- agronomy-1551544-supplementary.pdf
